# Supplementary material for: Plasmon-enhanced parabolic nanostructures for broadband absorption in ultra-thin crystalline Si solar cells
Source: Royal Society of Chemistry journal article supplement (doi:10.1039/d3na00436h), 2023-01-01
Supplement: d3na00436h1.pdf [file d3na00436h1.pdf]

## Electronic Supplementary Information

### Plasmon-enhanced parabolic nanostructures for broadband absorption in ultra-thin crystalline Si solar cells†

Yeasin Arafat Pritom,<sup>a</sup> Dipayon Kumar Sikder,<sup>b</sup> Sameia Zaman,<sup>b,c</sup> and Mainul Hossain\*<sup>a</sup>

<sup>a</sup>Department of Electrical and Electronic Engineering, University of Dhaka, Dhaka-1000, Bangladesh.

<sup>b</sup>Department of Electrical and Electronic Engineering, Bangladesh University of Engineering and Technology, Dhaka-1205, Bangladesh.

<sup>c</sup>Department of Electrical Engineering and Computer Science, Massachusetts Institute of Technology, Cambridge, MA 02139, USA.

\*E-mail: [mainul.eee@du.ac.bd](mailto:mainul.eee@du.ac.bd)

## 2. Methodology

### 2.1 Device structure and simulation method

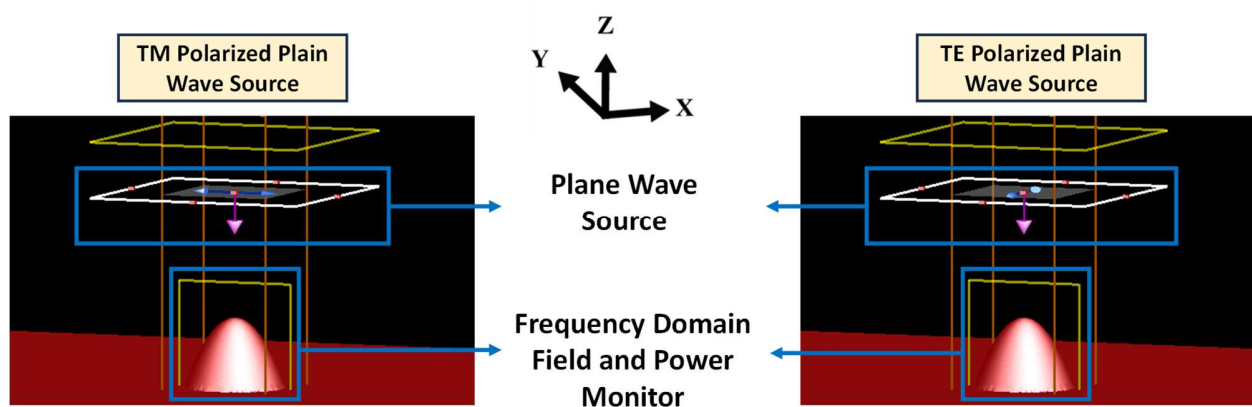

Fig. S1† Simulation setup showing the position of the field and power monitors for both TM and TE polarized incident waves.

### 3. Result and discussion

#### 3.3 Nanoparticle size

**Table S1†** Change in filling ratio with diameter of Au NP

| Diameter of Au NP ( $d_{Au}$ ) | Base Width of parabola ( $W_b$ ) | Period (P)<br>$P = W_b + 2d_{Au}$ | Height of parabola (H) | Filling Ratio ( $W_b/P$ ) |
|--------------------------------|----------------------------------|-----------------------------------|------------------------|---------------------------|
| Bare Parabola                  | 450 nm                           | 450 nm                            | 500 nm                 | 1.000                     |
| 20 nm                          | 450 nm                           | 490 nm                            | 500 nm                 | 0.918                     |
| 25 nm                          | 450 nm                           | 500 nm                            | 500 nm                 | 0.900                     |
| 30 nm                          | 450 nm                           | 510 nm                            | 500 nm                 | 0.882                     |
| 35 nm                          | 450 nm                           | 520 nm                            | 500 nm                 | 0.865                     |
| 37 nm                          | 450 nm                           | 524 nm                            | 500 nm                 | 0.859                     |
| 39 nm                          | 450 nm                           | 528 nm                            | 500 nm                 | 0.852                     |
| 40 nm                          | 450 nm                           | 530 nm                            | 500 nm                 | 0.849                     |
| 42 nm                          | 450 nm                           | 534 nm                            | 500 nm                 | 0.843                     |
| 45 nm                          | 450 nm                           | 540 nm                            | 500 nm                 | 0.833                     |
| 50 nm                          | 450 nm                           | 550 nm                            | 500 nm                 | 0.818                     |

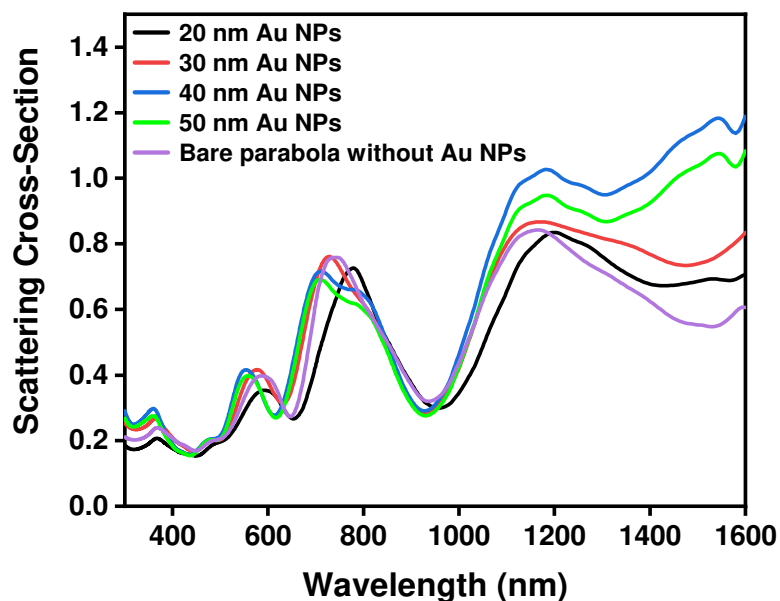

**Fig. S2†** Results of FDTD simulations with TM polarized incident light showing scattering cross-sections of Au NP embedded Si parabola with different diameters of Au NPs for wavelengths ranging between 300 nm and 1600 nm.

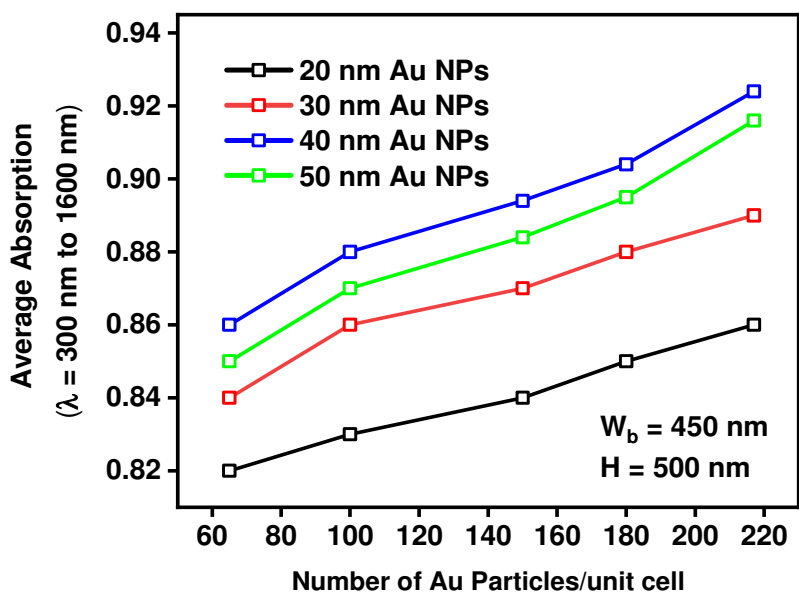

**Fig. S3†** Results of FDTD simulations with TM polarized incident light showing the average absorption between  $\lambda = 300$  nm and 1600 nm vs the number of Au NPs per unit cell of the parabola. The diameters of the Au NPs are taken as 20 nm, 30 nm, 40 nm, and 50 nm.

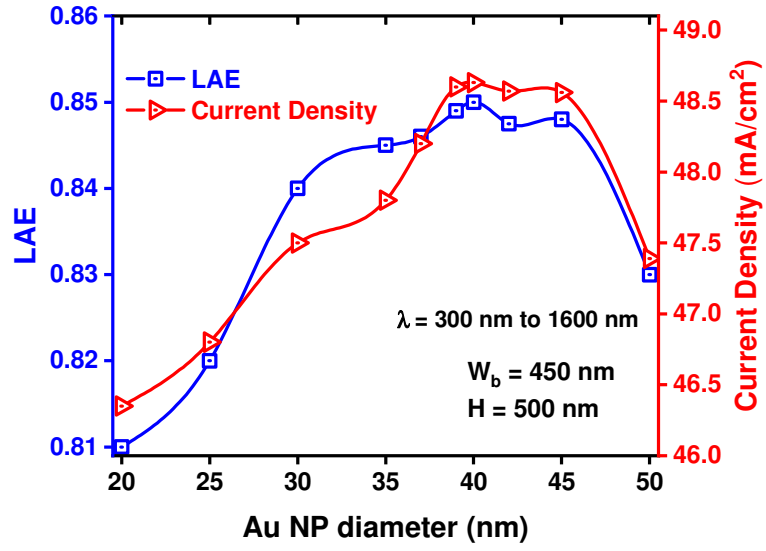

Fig. S4† Results of FDTD simulations with TM polarized incident light showing the light absorption efficiency (LAE)\* and current density between  $\lambda = 300$  nm and 1600 nm for Au NPs having different diameters.

\*LAE is calculated as follows:<sup>1</sup>

$$LAE = \frac{\int_{300nm}^{1600nm} \frac{\lambda}{hc} A(\lambda)_{with\_NPs} I_{AM1.5G}(\lambda) d\lambda}{\int_{300nm}^{1600nm} \frac{\lambda}{hc} I_{AM1.5G}(\lambda) d\lambda}$$

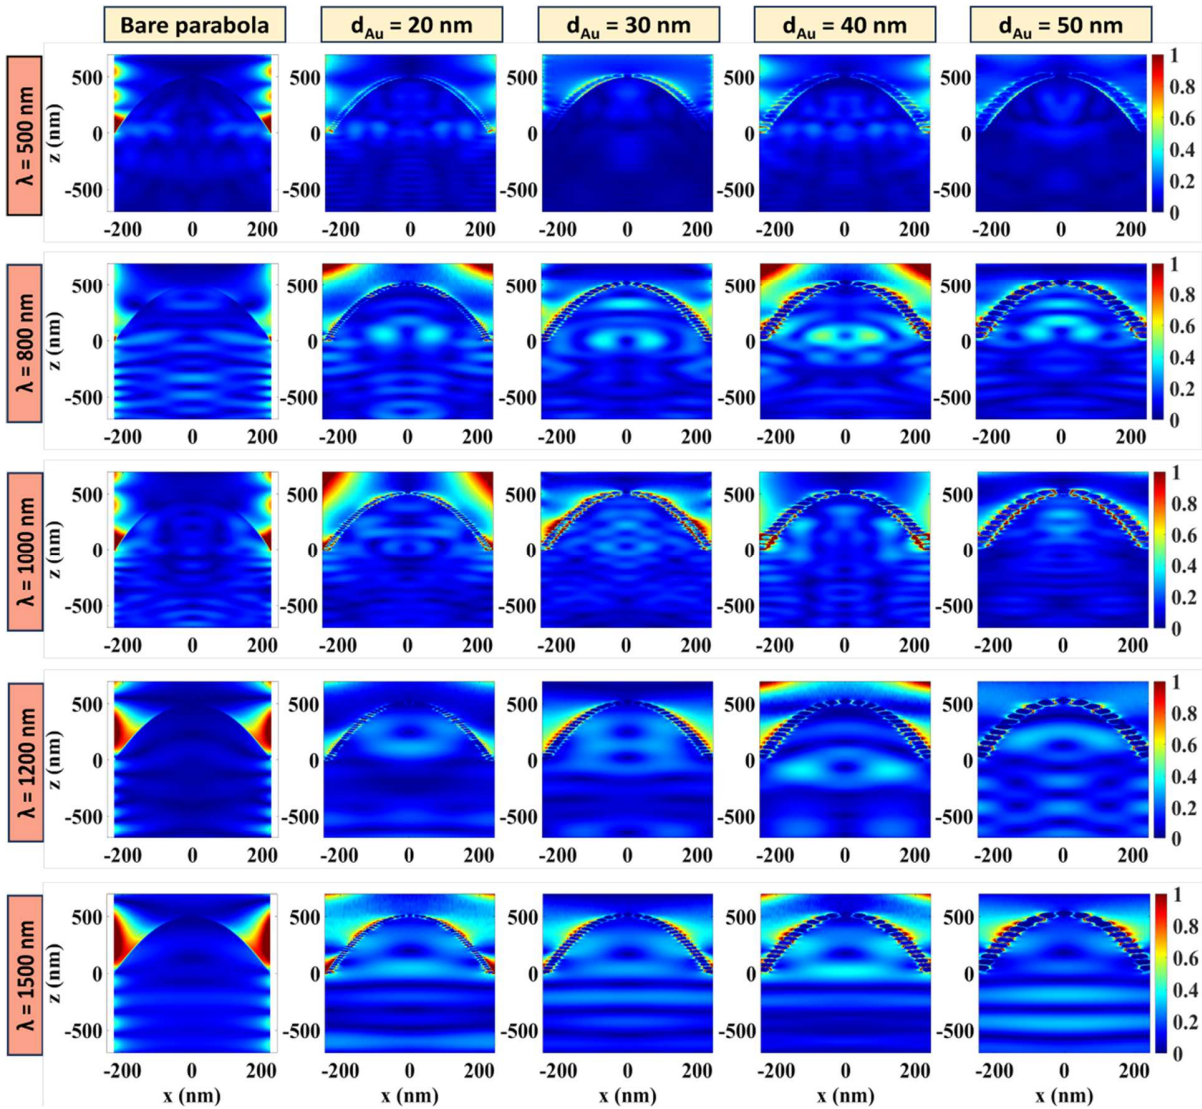

Fig. S5† The normalized electric-field distributions of the bare and Au NP coated parabolic nanostructures for the TE polarized incident light at  $\lambda = 500$  nm, 800 nm, 1000 nm, 1200 nm, and 1500 nm. The diameters of the Au NPs are taken as 20 nm, 30 nm, 40 nm and 50 nm and bare Si parabola is shown as the reference.

## References

- 1 S. Zaman, M. M. Hassan, M. Hasanuzzaman and M. Z. Baten, *Opt. Express*, 2020, **28**, 25007.
